# Supplementary material
Source: PubMed Central journal article supplement (PMC5199711)

**Supplementary Figure 1. Duration of red cell storage does not affect vital signs following transfusion. (A-D)** The medians (I bars represent interquartile ranges) for temperature, heart rate, systolic blood pressure, and diastolic blood pressure are shown from pre-transfusion to 15-minutes into transfusion, immediately post-transfusion, and 1-hour post-transfusion, as labeled. N=52 total.

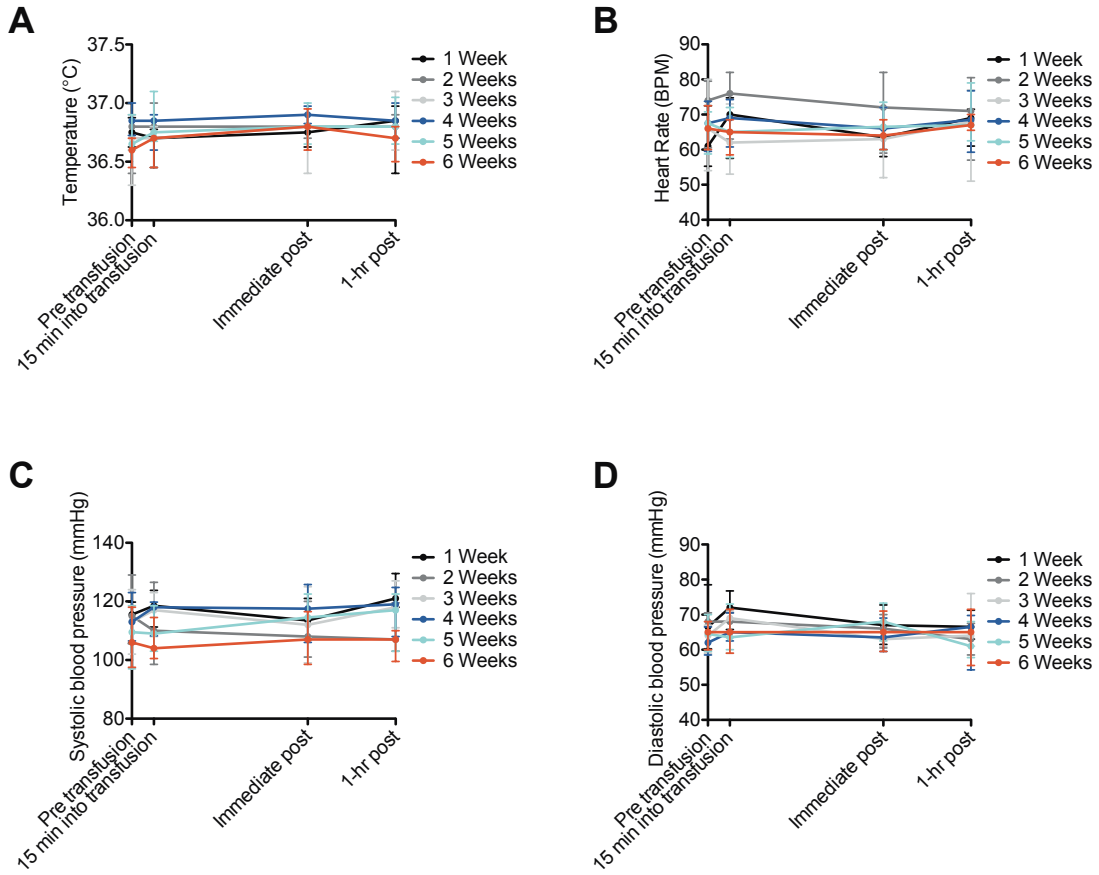

Supplement: jci-127-90837-s001.pdf [file jci-127-90837-s001.pdf]
